# Supplementary material for: GW0742 activates miR‐17‐5p and inhibits TXNIP/NLRP3‐mediated inflammation after hypoxic‐ischaemic injury in rats and in PC12 cells
Source: PubMed Central journal article supplement (PMC7686982; doi:10.1111/jcmm.15698), 2020-10-09
Supplement: JCMM-24-12318-s001.pdf [file JCMM-24-12318-s001.pdf]

## Supplementary information

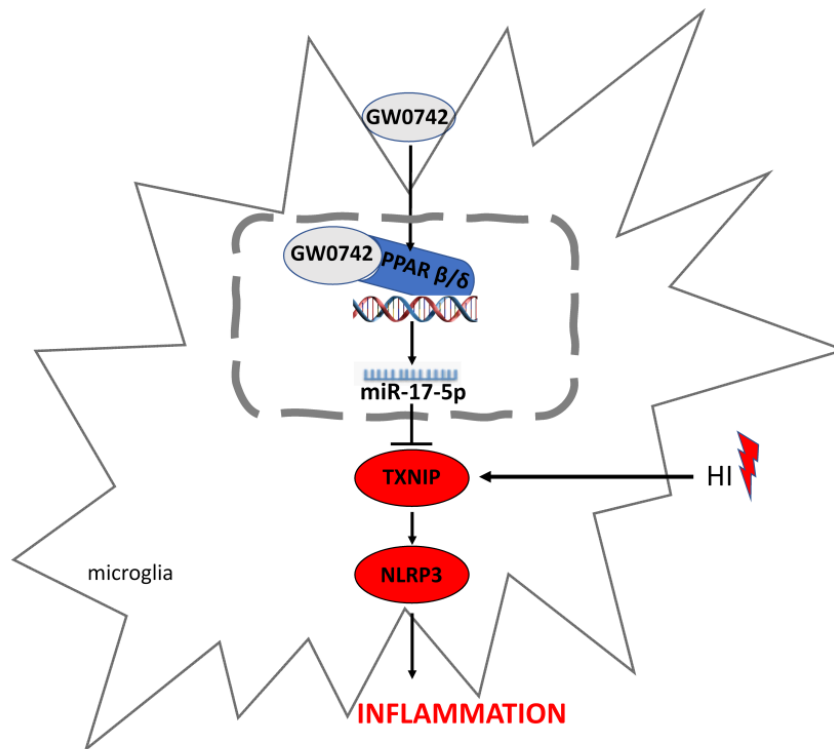

SUPPLEMENTARY FIGURE 1. Illustration of proposed mechanism.

TXNIP  
46 kDa

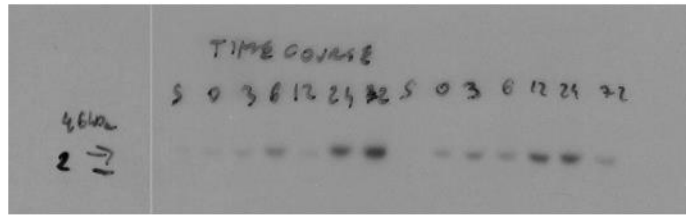

NLRP3  
120 kDa

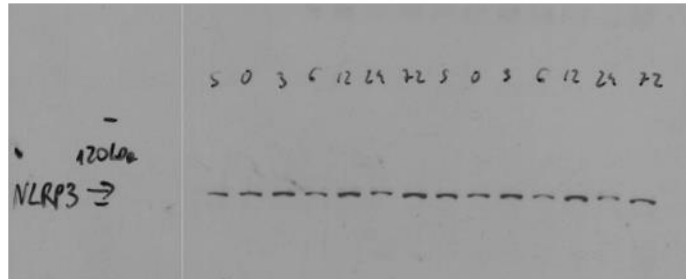

Cleaved  
caspase-1  
20 kDa

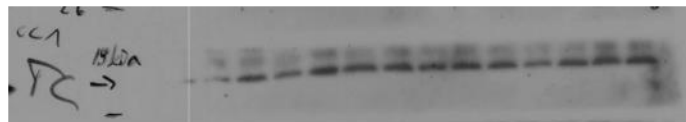

IL-1 $\beta$   
20 kDa

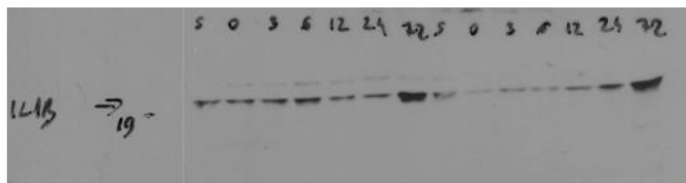

$\beta$ -actin  
42 kDa

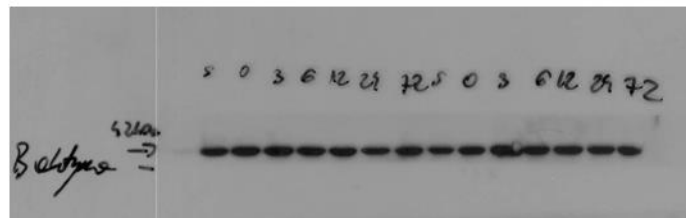

SUPPLEMENTARY FIGURE 2. Western blot membranes for time-course experiment shown in Fig.1.

NLRP3  
120 kDa

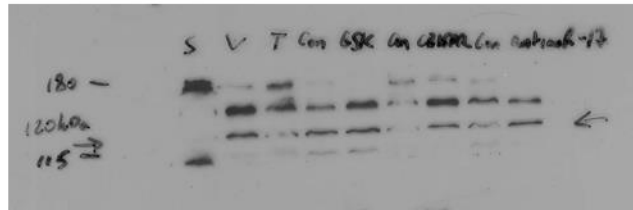

Cleaved  
caspase-1  
20 kDa

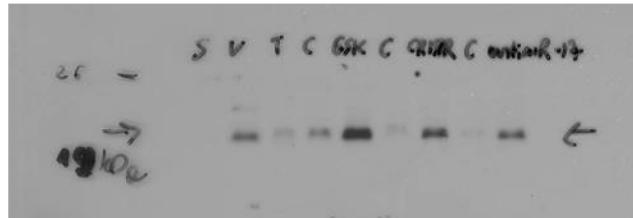

IL-1 $\beta$   
20 kDa

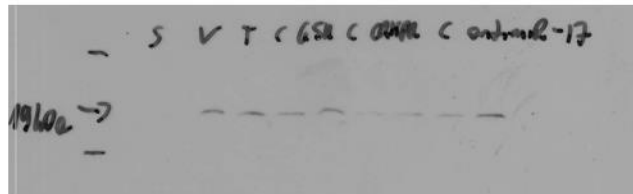

TNF- $\alpha$   
26 kDa

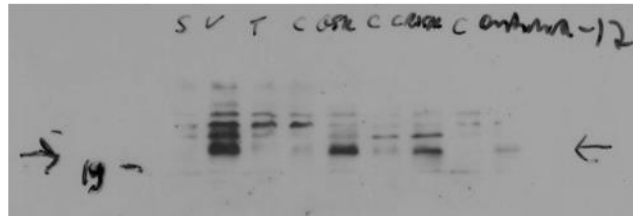

IL-6  
21 kDa

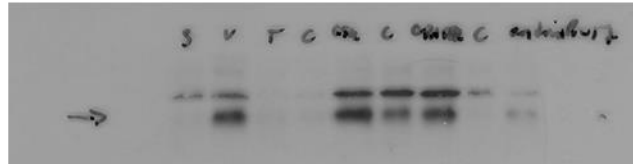

$\beta$ -actin  
42 kDa

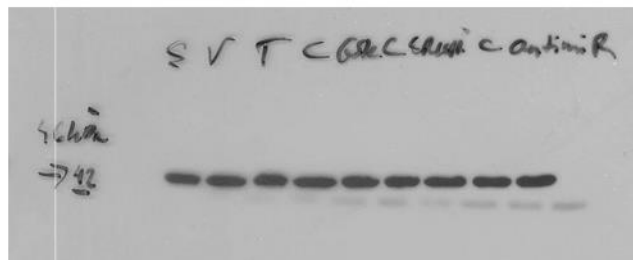

SUPPLEMENTARY FIGURE 3. Western blot membranes for mechanism study experiment shown in Fig.5.

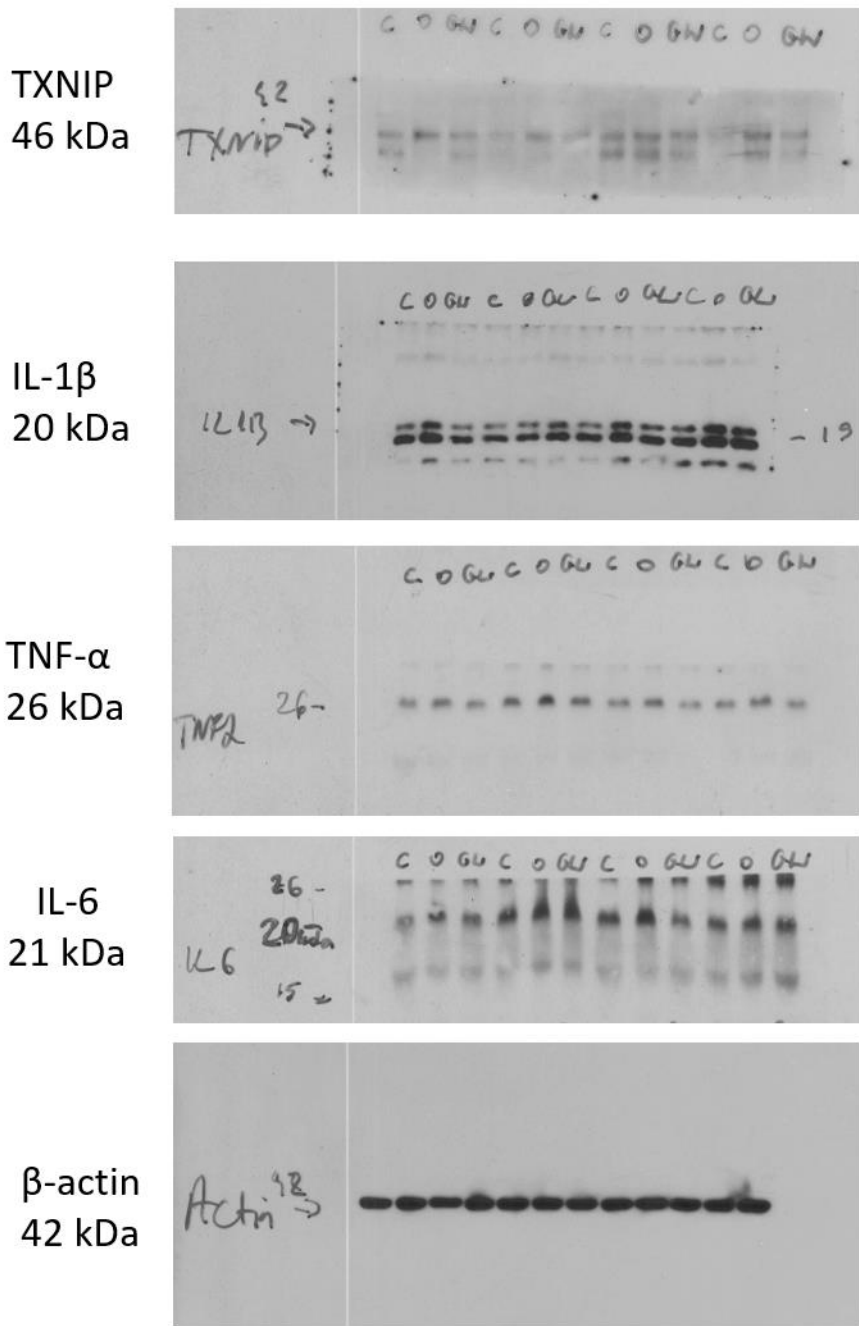

SUPPLEMENTARY FIGURE 4. Western blot membranes for PC12 cell culture experiment shown in figure 6.
